# 1 Double nicking by RNA-directed Cascade-nCas3 for high-efficiency 2 large-scale genome engineering

3 Yile Hao<sup>1</sup>, Qinhua Wang<sup>1</sup>, Jie Li<sup>1</sup>, Shihui Yang<sup>1</sup>, Lixin Ma<sup>1</sup>, Yanli Zheng<sup>2\*</sup> and Wenfang Peng<sup>1\*</sup>

4 <sup>1</sup>State Key Laboratory of Biocatalysis and Enzyme Engineering, Hubei Engineering Research Center  
5 for Bio-enzyme Catalysis, Environmental Microbial Technology Center of Hubei Province, Hubei  
6 Collaborative Innovation Center for Green Transformation of Bio-resources, School of Life Sciences,  
7 Hubei University, Wuhan 430062, P.R. China

8 <sup>2</sup>College of Life Science and Technology, Wuhan Polytechnic University, Wuhan 430023, P. R. China

9 \* To whom correspondence should be addressed. Wenfang Peng, Email: [wenfang@hubu.edu.cn](mailto:wenfang@hubu.edu.cn)

10 Correspondence may also be addressed to Yanli Zheng. Email: [Yanli.Zheng@whpu.edu.cn](mailto:Yanli.Zheng@whpu.edu.cn)

11 E-mail:

12 YH: 201911110711049@stu.hubu.edu.cn

13 QW: 2766242870@qq.com

14 JL: 2912378321@qq.com

15 SY: Shihui.Yang@hubu.edu.cn

16 LM: malixing@hubu.edu.cn

17 YZ: Yanli.Zheng@whpu.edu.cn

18 WP: wenfang@hubu.edu.cn

19

20 New CRISPR-based genome editing technologies are developed to continuedly drive advances in life  
21 sciences, which, however, are predominantly derived from systems of Type II CRISPR-Cas9 and  
22 Type V CRISPR-Cas12a for eukaryotes. Here we report a novel CRISPR-n(nickase)Cas3 genome  
23 editing tool established upon an endogenous Type I system of *Zymomonas mobilis*. We demonstrate  
24 that nCas3 variants can be created by alanine-substituting any catalytic residue of the Cas3 helicase  
25 domain. While nCas3 overproduction via plasmid shows severe cytotoxicity; an *in situ* nCas3  
26 introduces targeted double-strand breaks, facilitating genome editing, without visible cell killing. By  
27 harnessing this CRISPR-nCas3, deletion of genes or genomic DNA stretches can be consistently  
28 accomplished with near-100% efficiencies, including simultaneous removal of two large genomic  
29 fragments. Our work describes the first establishment of a CRISPR-nCas3-based genome editing  
30 technology, thereby offering a simple, easy, yet useful approach to convert many endogenous Type I  
31 systems into advanced genome editing tools. We envision that many CRISPR-nCas3-based toolkits  
32 would be soon available for various industrially important non-model bacteria that carry active Type I  
33 systems to facilitate high-throughput prokaryotic engineering.

34

35

36

37 CRISPR-Cas systems are a group of RNA-guided machineries that defend their prokaryotic hosts  
38 against invasive genetic elements in a programmable manner (Barrangou et al. 2007; Brouns et al.  
39 2008). The targetable DNA-binding Cas nucleases are therein applied in generating double-stranded  
40 DNA breaks (DSBs) at specific chromosomal loci, stimulating the host repair mechanisms, including  
41 homology-directed repair (HDR) and non-homologous end joining (NHEJ), to bring about designed or  
42 error-prone genomic alterations (Anzalone et al. 2020). Such applications have been currently  
43 focused on the compact Class 2 systems with a single Cas effector on account of their simplicity and  
44 hence ease of heterologous use (Makarova et al. 2020). Among Class 2 systems, the notable  
45 CRISPR-Cas9 from *Streptococcus pyogenes* has been pioneered successful genome editing in  
46 various organisms or cell lines (Graham and Root 2015; Barrangou and Doudna 2016). The success  
47 of wild-type Cas9-based applications has also fuelled the development of the technologies based on  
48 its derivatives, such as the nCas9 (Cas9 nickase) that possesses several advantages over the  
49 original (Anzalone et al. 2020). For instance, a paired-nCas9 strategy can be used to greatly enhance  
50 DNA targeting specificity and consequently lower off-targeting in genome editing (Ran et al. 2013).  
51 Additionally, nCas9 can help deaminases to yield more predictable and precise genome editing  
52 compared with wild-type Cas9-based editing (Nishida et al. 2016).

53 Despite of the versatility and robustness of the CRISPR-Cas9/nCas9 technologies, their  
54 applications in prokaryotes have been rather limited, because overexpressing the exogenous Cas  
55 proteins in most bacteria could be cytotoxic and would lead to failure in yielding colonies (Vento et al.  
56 2019). As an alternative strategy, several Type I CRISPR-Cas3 systems belonging to Class 1 have  
57 been exploited to work as “built-in” genome editing tools in their native hosts (Zheng et al. 2020; Xu et  
58 al. 2021), including Type I-A of *Sulfolobus islandicus* (Li et al. 2016), Type I-B of *Haloarcula hispanica*  
59 (Cheng et al. 2017) and *Clostridium* species (Pyne et al. 2016; Zhang et al. 2018), Type I-C of  
60 *Pectobacterium aeruginosa* (Csorgo et al. 2020), Type I-E of *Streptococcus thermophilus* (Canez et al.  
61 2019) and *Lactobacillus crispatus* (Hidalgo-Cantabrana et al. 2019), and Type I-F of *Pectobacterium*  
62 species (Vercoe et al. 2013; Xu et al. 2019), and *Zymomonas mobilis* (Zheng et al. 2019), where the  
63 processive Cas3 nuclease-helicase was used to generate chromosomal injuries. Recent studies have  
64 also employed Type I-D and I-E systems for DNA cleavage in plants (Osakabe et al. 2020) and  
65 human cells (Cameron et al. 2019; Dolan et al. 2019; Morisaka et al. 2019), respectively, and Type I-  
66 E and I-F systems for gene expression modulation in human cells (Pickar-Oliver et al. 2019; Chen et  
67 al. 2020), further broadening the applicability of CRISPR-Cas3-based technologies. These  
68 accomplishments have paved a new possibility to develop advanced CRISPR-nCas3 toolkits based  
69 on endogenous Type I systems. Yet, to the best of our knowledge, no CRISPR-nCas3-based  
70 technology has been currently available.

71 We have previously accomplished genome engineering with the endogenous Type I-F CRISPR-  
72 Cas3 system of *Z. mobilis* ZM4. In the work, the editing options concerning single genes, including  
73 knockout, replacement, and *in situ* nucleotide substitutions, yielded 100% efficiencies; whereas others  
74 did not, for example, while at most 50% efficiency could be got in the deletion of a large genomic  
75 fragment (ca. 5% of the genome) (Zheng et al. 2019). Here we have, for the first time, developed a  
76 CRISPR-nCas3 genome editing tool, which has enabled large-scale genomic deletions with near-

77 100% efficiencies that is currently hardly achievable using other methodologies. In addition, this tool  
78 has allowed for simultaneous deletion of two large genomic fragments with an efficiency of up to 75%,  
79 showing its great potential to sever as a versatile tool for high-throughput metabolic engineering  
80 practices.

81

## 82 **Results**

### 83 **Inactivation of the helicase domain converts the Cas3 nuclease-helicase into a nickase**

84 Cas3 possesses activities of ssDNA-specific nuclease and ATP-dependent helicase, being  
85 responsible for target cleavage and degradation in Type I CRISPR-Cas systems (He et al. 2020). The  
86 nuclease domain of Cas3 initially nicks the target sequence within the ssDNA region of an R-loop  
87 generated upon Cascade-binding and crRNA invasion. Subsequently, by consuming ATP, Cas3  
88 unwinds the dsDNA starting at the nicked site via its helicase domain to further provide ssDNA  
89 substrate for its nuclease domain, eventually leading to complete target degradation (Sinkunas et al.  
90 2011; Hidalgo-Cantabrana and Barrangou 2020). We reasoned that mutating the catalytic residues of  
91 the helicase domain might convert Cas3 into a nickase (nCas3), which could no longer unwind the  
92 dsDNA due to the loss of its ATPase activity. To verify this assumption, we opted to create nCas3  
93 variants and assess their capability on plasmid DNA nicking.

94 Amino acid sequence alignment of the Cas3 from *Z. mobilis* (*ZmoCas3*), actually a Cas2-Cas3  
95 fusion encoding by the *cas2/3* gene (Zheng et al. 2019), with several reported Cas3 homologs had  
96 revealed its characteristic helicase motifs (I, II and VI) coordinating ATP binding and hydrolysis  
97 (Sinkunas et al. 2011; Gong et al. 2014) (**Fig. 1a** and **Figure S1**). We therefore designed alanine  
98 substitution of conserved residues including K458 located in motif I, D608 in motif II, and R887 in  
99 motif VI (**Fig. 1b**). The variants, as well as the wild-type *ZmoCas3*, could be recombinantly produced  
100 in *Escherichia coli* as soluble proteins (**Fig. 1c**), and each of which, together with the Cascade-crRNA  
101 complex, was incubated with a 3,283-bp negatively supercoiled (NS) plasmid, pL2R (Zheng et al.  
102 2019) (**Table S1**), bearing a functional 5'-CCC-3' PAM-preceded protospacer sequence. The treated  
103 DNAs were subsequently subjected to electrophoreses using agarose gels. As shown in **Fig. 1d**,  
104 following nicking the NS plasmid into an open circle (OC) DNA, the wild-type *ZmoCas3* (wt) eventually  
105 degraded the plasmid DNA completely; whereas the nCas3 variants gradually nicked the NS plasmid  
106 DNA into the OC version. Linear (L) DNAs were also observed, indicative of the occurrence of DSBs.  
107 Possibly, in the finite *in vitro* reactions the nuclease domain of free nCas3 variants could have  
108 occasionally touched and cut the opposite strand of the nicked site. These results suggested that all  
109 these variants are nCas3s.

110

### 111 **Overexpression of nCas3 has potent killing effect on *Z. mobilis* cells**

112 Having determined the nickase nature of the nCas3 mutants, we next studied whether they could be  
113 employed to make DSBs through double nicking for genome editing in *Z. mobilis*. We chose the  
114 *ZMO0038* gene as an editing target because it has been ever taken for evaluating the effect of donor  
115 sizes on genome editing efficiency in our previous work, where good performance was got with one of

116 the tested plasmids, pKO-ZMO0038-3 carrying a 600-bp donor DNA (Zheng et al. 2019). We thus  
117 constructed the editing plasmids based on pKO-ZMO0038-3. Since paired crRNAs simultaneously  
118 targeting two genomic loci were required for double nicking, a new editing plasmid, pKO-ZMO0038n,  
119 was constructed to bear an artificial CRISPR array consisting of two spacers derived from different  
120 strands and three insulating direct repeats. Two different crRNA guides were to be produced from the  
121 plasmid-borne artificial CRISPR and were expected to direct a pair of Cascade-nCas3 units to  
122 introduce double nicks on different strands of the target, generating a DSB with an overhang (**Fig. 2a**).

123 Initially, taking the convenience of protein expression via an episomal vector, we cloned each gene  
124 encoding an nCas3 variant to pKO-ZMO0038n, yielding three editing plasmids, pKO-ZMO0038-  
125 K458A, pKO-ZMO0038-D608A, and pKO-ZMO0038-R887A (**Table S1**). These editing plasmids, and  
126 the cloning vector pEZ15Asp as a reference (Yang et al. 2016), were then individually electroporated  
127 into *Z. mobilis*  $\Delta cas2/3$ , a previously constructed *cas2/3* knockout (Zheng et al. 2019). Only very few  
128 transformants could be yielded from transformations with the editing plasmids, showing hundreds-fold  
129 lower transformation rates than that with the reference plasmid (**Fig. 2b**) and thereby reflecting a  
130 potent killing effect of the nCas3s on the host cells.

131 Speculatively, overexpression of the nCas3 variants was toxic to *Z. mobilis* cells. To verify this  
132 speculation, we removed the artificial CRISPR from the editing plasmids, generating three expression  
133 plasmids, pEZ-K458A, pEZ-D608A, and pEZ-R887A (**Table S1**), with each expressing a  
134 corresponding nCas3 whereas no crRNA production. We failed in yielding any transformant from the  
135 transformations with these expression plasmids (**Table 1**), suggestive of strong cytotoxicity of the  
136 nCas3s *per se* to the *Z. mobilis* cells.

137 Indeed, it was reported that, if not properly controlled, endonucleases in CRISPR-Cas systems  
138 provided protection with the risk of toxic activity against the host (Leon et al. 2018). Bacteria have  
139 therefore evolved different mechanisms to modulate the activity of Cas nucleases. For example, in  
140 Type I-F systems four Cas1 molecules form a complex with two molecules of Cas2-Cas3 fusion to  
141 neutralize the nuclease activity of the latter (Rollins et al. 2017). Reasonably, such a balance might be  
142 broken by the overproduction of a Cas3 nickase that disrupted the certain ratio between the subunits.

143

#### 144 **A CRISPR-nCas3 genome editing tool is established upon an *in situ* nCas3 variant**

145 In order to attain genome editing with the CRISPR-nCas3 system, we next sought to generate an *in*  
146 *situ* nCas3 by introducing alanine substitution of the D608 residue. To this end, a genome editing  
147 plasmid, pNS-*cas2/3* for nucleotide substitutions of *cas2/3*, was designed. By carefully inspecting the  
148 coding sequences in the vicinity of the D608 residue, a 5'-TCC-3' PAM located on the template strand  
149 was found and therefore the 32-nt sequence immediately downstream of it was considered as a  
150 protospacer (**Fig. 2c**).

151 Three nucleotide changes were introduced into the donor DNA, that is, C-1T, C3T, and T25G,  
152 where for clarity, we defined the numbering scheme for protospacer positions as following: the  
153 position immediately downstream of PAM is called 1, with subsequent positions being 2, 3, *etc.*, up to  
154 32; while positions within the PAM are referred to as -1, -2, and -3, with -1 is the closest to the  
155 protospacer. The C-1T and C3T substitutions interrupted the functional 5'-TCC-3' PAM and the seed

156 sequence to allow for cell surviving after editing, which did not result in any change of protein  
157 sequences; whilst the T25G mutation resulted in altering the original GAT codon for aspartic acid (D)  
158 to the GCT codon for alanine (A). In addition, the C3T mutation led to the formation of a TTAAA  
159 restriction site for the Dral endonuclease (**Fig. 2c**). This allowed us to rapidly screen strains with  
160 expected edits by colony PCR amplification of DNA fragments encompassing the edited region  
161 followed by Dral treatment of the PCR products.

162 More than 200 transformants were yielded after transforming the pNS-cas2/3 plasmid into the  
163 DRM1 cells (Zheng et al. 2019). Using the primer set of cas2/3-chk-F and cas2/3-chk-R  
164 (**Supplementary Table S2**), DNA fragments of 4,099 bp were amplified from 4 randomly picked  
165 transformants. The PCR products were then digested with Dral followed by electrophoretic analysis  
166 using an agarose gel. Dral treatment of the reference sample would produce 3 bands with the sizes of  
167 911 bp, 2,121 bp, and 1,067 bp, respectively. If the modifications correctly occurred, an additional  
168 Dral restriction site would be introduced in the 2,121-bp fragment, such that the 2,121-bp DNA would  
169 be further cut into two fragments of 1,232 bp and 889 bp by Dral (**Fig. 2d**). The results suggested that  
170 the designed *in situ* nCas3 was successfully generated and confirmed via analyses of Dral treatment  
171 and Sanger sequencing of the PCR products (**Fig. 2e,f**).

172 The resulting Cas3(D608A) strain, designated *Z. mobilis* DRM2, was then used as the genetic host  
173 for CRISPR-nCas3 genome editing. Knockout of *ZMO0038* was attempted in *Z. mobilis* DRM2 cells  
174 to assess the capability of CRISPR-nCas3 in genome editing. Transformation of DRM2 competent  
175 cells with the pKO-*ZMO0038n* yielded hundreds of transformants, showing a transformation rate of  
176 only about 10-fold lower than that with the reference plasmid (**Table 1**). As expected, after HDR of the  
177 DSB generated through double nicking by a pair of Cascade-nCas3 units, deletion of the target gene  
178 would occur (**Fig. 3a**). Of the obtained transformants, 16 were randomly picked up and analysed by  
179 colony PCR and Sanger sequencing genotypic characterization. The results showed that all the  
180 tested transformants were identified to harbour the designed deletion of *ZMO0038* (**Fig. 3b,c**), giving  
181 an editing efficiency of 100% (**Table 1**).

182 We noticed that transformation of DRM2 with pKO-*ZMO0038n* got a rate of about 10-fold higher  
183 than that obtained from transformation of DRM1 cells with the pKO-*ZMO0038* plasmid in our previous  
184 study (Zheng et al. 2019). Although in both cases the efficiencies of *ZMO0038* knockout were of  
185 100%, the latter was attained by improving pKO-*ZMO0038* transformation rate through destroying a  
186 restriction-modification (R-M) system (Zheng et al. 2019). The further enhanced pKO-*ZMO0038n*  
187 transformation rate might reflect a greater capability of the CRISPR-nCas3 in genome editing. To  
188 corroborate this, we constructed the pKO-*ZMO0252* plasmid by taking the same strategy as illustrated  
189 in **Fig. 3a** to delete the 8,955-bp *ZMO0252* gene encoding a component of a predicted Type I  
190 secretion system (Zhang et al. 2019), looking at whether the CRISPR-nCas3 could also mediate  
191 efficient removal of larger genomic fragments. Transforming pKO-*ZMO0252* into DRM2 cells yielded  
192 hundreds of transformants. Among them, 16 were randomly chosen and 15 out of which were  
193 identified to be edited cells with the desired genotypes (**Fig. 3b,c**), showing an editing efficiency of  
194 93.75% (15/16) (**Table 1**). Strikingly, an efficiency of 87.5% was also yielded in the experiment of  
195 deleting the 10,021-bp genomic fragment that we took as an editing target in our previous work



196 (Zheng et al. 2019) (**Fig. 3b; Table 1**). We also used these editing plasmids to perform the same  
197 genome editing options in DRM1 cells using the CRISPR-Cas3 tool, yielding editing efficiencies of  
198 31.25% and 37.5% for deletion of *ZMO0252* and 10-kb fragment, respectively. Particularly, for the 10-  
199 kb fragment deletion experiment, both the transformation rates of editing plasmid and the editing  
200 efficiency are comparable to that seen in our previous study (**Table 1**). These results demonstrated  
201 the overall reproducibility of the observed high-efficiency editing via CRISPR-nCas3.

202

### 203 **CRISPR-nCas3 enables simultaneous removal of large genomic fragments**

204 To further illustrate the versatility of this CRISPR-nCas3-based technology, we opted to use it for  
205 simultaneously removing two large genomic loci using a single editing plasmid, pRMV (**Fig. 4a**). After  
206 electroporating pRMV into DRM2 cells, hundreds of transformants appeared on the selective plate,  
207 getting an average transformation rate of  $(7.26 \pm 0.25) \times 10^4$  CFU/ $\mu$ g plasmid DNA (**Table 1**). Of the  
208 obtained transformants, 16 were randomly selected for genotypic characterization by colony PCR  
209 analysis using specific primer sets listed in **Table S2**. As shown in **Fig. 4b**, 13 colonies (*i.e.* Strains 1-  
210 5, 7-9, 11, and 13-16) contain the 10-kb fragment deletion, while 14 colonies (*i.e.* Strains 2-9 and 11-  
211 16) are *ZMO0052* knockouts. Collectively, a total of 15 colonies carry at least one deletion, giving an  
212 overall editing efficiency of 93.75%. Notably, 12 strains contain both the deletions, showing an  
213 engineering efficiency of 75% (**Fig. 4c**).

214

## 215 **Discussion**

216 This work reports the first establishment, to the best of our knowledge, of an advanced CRISPR-  
217 nCas3 genome editing method in *Z. mobilis*, which includes a Cas3 nickase. Differently from the Cas9  
218 nucleases which use two nuclease domains, an NHN and a RuvC, to respectively cleave the different  
219 strands of a dsDNA target (Cong et al. 2013), Cas3 proteins in Type I systems use only one ssDNA  
220 nuclease domain to gradually nick the two strands (Sinkunas et al. 2011). As previously demonstrated,  
221 Cas3 is recruited to a target upon formation of an ssDNA-containing R-loop through crRNA-directed  
222 Cascade-binding and cuts the displaced ssDNA strand first; whilst cleavage of the crRNA-paired  
223 strand requires its ATP-dependent helicase domain to unwind the dsDNA target (Sinkunas et al.  
224 2011). This feature allows us to generate the Cas3 nickase mutants by inactivating the helicase  
225 domain of the Cas3 nuclease-helicase. Interestingly, as there are several residues essential for the  
226 helicase activity (Sinkunas et al. 2011; Gong et al. 2014), it is flexible to create different nickase  
227 mutants by inactivating any of the essential residues. By contrast, an nCas9 can only be a mutant of  
228 either a D10A in RuvC or a H840A in HNH (Ran et al. 2013). As derived from an endogenous system,  
229 it is more convenient to simultaneously produce crRNA pairs, which is an important requirement for  
230 nCas-mediated genome editing (Ran et al. 2013), through processing the precursor RNAs of the  
231 single artificial CRISPR by the Csy4/Cas6f protein (Przybilski et al. 2011).

232 Given the fact that enhanced DNA targeting specificity was achieved with a CRISPR-nCas9 (Ran et  
233 al. 2013), the same should be also true for this CRISPR-nCas3, being of increased genome editing  
234 specificity. Also, as the nCas9 showed an obvious advantage in helping base editing over other Cas9  
235 variants (Nishida et al. 2016), we envision that nCas3-based toolkits, such as base editors, would be

236 soon available for various bacteria harbouring an active Type I CRISPR-Cas. Furthermore, very  
237 recently a Type I-C system has been evidenced for genome editing in several bacteria (Csorgo et al.  
238 2020). Type I-F systems have relatively fewer Cas components among the Type I subtypes  
239 (Makarova et al. 2020), they thereby could be also readily portable for heterologous genome editing in  
240 other organisms.

241 Significantly elevated editing efficiencies (near-100%) were observed in the application of CRISPR-  
242 nCas3 tool for genome editing including simultaneous deletion of large genomic fragments. Our  
243 previous demonstrations showed that only up to 50% efficiency for removal of one large genome  
244 fragment could be attained, and simultaneous deleting multiple small DNA stretches yielded an  
245 efficiency of 18.75%. We noticed that, for simultaneous removal two large genome fragments, the  
246 transformation rate of the editing plasmid and the engineering efficiency are at the same level as that  
247 observed for deletion of either of them, indicating that simultaneously deleting more genomic targets  
248 would be also efficiently achieved with this CRISPR-nCas3 tool. Since editing efficiencies rely largely  
249 on the repair rates of DSBs by the host's repair systems, together with the fact that *Z. mobilis* lacks an  
250 NHEJ system, the enhancement of editing efficiency might be due to faster repair of the DSBs by the  
251 HDR systems, thereby letting more cells be recovered from self-targeting. Possibly, the DSB ends  
252 produced by nCas3-mediated double nicking each carries an overhang structure, which might be  
253 more efficiently sensed and bound by RecA to initial DSB repair (Wigley 2013). Another possibility  
254 could be also that the overhangs might trigger or activate an alternative repair system with an even  
255 higher efficacy, as bacteria generally possess multiple HDR systems (Bernheim et al. 2019), for  
256 instance *Z. mobilis* ZM4 encodes at least two HDR mechanisms, *i.e.* an AddAB and a RecF (Yang et  
257 al. 2018). By the way, this work offers an easy method to produce DSBs at defined genomic locations  
258 with expected terminal structures for studying HDR mechanisms in bacteria *in vivo*. Other possibilities  
259 include that double nicking by nCas3 might be lesser toxic than processive degradation by Cas3  
260 nuclease-helicase, thus enabling more cells to be recovered. Bacteria are generally sensitive to  
261 CRISPR-mediated chromosomal self-targeting. Potent CRISPR self-targeting may lead to failure in  
262 yielding any recovered cells with the designed edits. Indeed, in this work, transformation of the same  
263 editing plasmid into cells with an nCas3 background yielded about 20-fold higher rate than into those  
264 with a Cas3 background (**Table 1**). In the future, comprehensive studies, combining structural, genetic  
265 and biochemical analyses, on the HDR mechanisms in *Z. mobilis* may offer molecular explanations  
266 for the observed phenomenon, as well as mechanistic insights for directing high-efficiency genome  
267 editing.

268 Conclusively, we have created a Type I-F CRISPR-nCas3-based technology that represents  
269 currently the most efficient and straightforward genome engineering tool for the important industrial  
270 bacterium *Z. mobilis*. It has allowed us to achieve highly efficient removal of genomic fragments in a  
271 large-scale manner in *Z. mobilis*, and hence would expedite the development and improvement of this  
272 bacterium as an ideal chassis for synthetic biology researches. This study expands the available tools  
273 for CRISPR-mediated genome engineering and may serve as a framework for future development of  
274 next-generation CRISPR-Cas technologies.

275

## 276 **Methods**

### 277 **Strains, growth conditions and electroporation of *Z. mobilis***

278 *Z. mobilis* ZM4 and derivatives constructed in this work were listed in **Supplementary Table S1**. *Z.*  
279 *mobilis* strains were grown at 30°C in an RMG medium (20 g/L glucose, 10 g/L yeast extract, 2 g/L  
280 KH<sub>2</sub>PO<sub>4</sub>). If required, spectinomycin was supplemented to a final concentration of 200 µg/mL for *Z.*  
281 *mobilis* and 50 µg/mL for *Escherichia coli*. Competent cells of *Z. mobilis* were prepared as previously  
282 described (Yang et al. 2016) and transformed with plasmids by electroporation using Bio-Rad Gene  
283 Pulser (0.1-cm gap cuvettes, 1.6 kV, 200 Ω, 25 µF) (Bio-Rad, Hercules, CA, USA) following the  
284 method developed for *Z. mobilis* (Okamoto and Nakamura 1992). Electroporated cells were incubated  
285 in an RMG2 medium for 3 hours at 30°C prior to plating.

286

### 287 **Construction of plasmids**

288 Artificial CRISPR expression plasmids were constructed based on the *E. coli-Z. mobilis* shuttle vector,  
289 pEZ15Asp (Yang et al. 2016). A DNA block consisting of the leader sequence of the chromosomal  
290 CRISPR2 as a promoter and three CRISPR repeats separated by two BsaI and two BsmBI restriction  
291 sequences in opposite orientation, respectively, was synthesized from GenScript (Nanjing, China) and  
292 used as a template for PCR amplification with the primer pair of L3R-XbaI-F/L3R-EcoRI-R. Then, the  
293 PCR product was digested with XmaI and BamHI and subsequently inserted into the pEZ15Asp  
294 vector, generating the base vector pL3R. Digestion of pL3R with BsaI generated a linearized plasmid  
295 having protruding repeat sequences of 4 nt at both ends. Double-stranded spacer DNAs were  
296 prepared by annealing two spacer oligonucleotides through being heated to 95°C for 5 min followed  
297 by cooling down gradually to room temperature. Likewise, the second spacer could be inserted in  
298 between of the repeats by using the BsmBI sites. The spacer fragments were designed to  
299 correspondingly carry protruding ends complementary to those in the linearized vector. Therefore,  
300 self-targeting plasmids each bearing an artificial CRISPR with two self-targeting spacers were  
301 generated by gradually ligating spacer inserts with the linearized vectors. By repeating the reactions,  
302 the pRMV plasmid for simultaneous remove of the two large genomic fragments was yielded.  
303 Subsequently, donor DNA fragments each containing a mutant allele of a target gene were generated  
304 by splicing and overlap extension PCR (SOE-PCR) (Horton et al. 1990) and individually cloned into  
305 their cognate self-targeting plasmids through the T5 exonuclease-dependent DNA assembly (TEDA)  
306 method (Xia et al. 2019). Genome editing plasmids for creating the nCas3 mutants were constructed  
307 based on the pL2R plasmid vector following the previously described method (Zheng et al. 2019).

308 Expression plasmids of Cas3 and Cascade proteins were constructed with the *E. coli* pET28a  
309 expression vector. Individual *cas* gene was PCR-amplified from *Z. mobilis* total DNA using specific  
310 primers listed in **Table S1**. The PCR product of *cas3* gene was used as a template to amplify the  
311 mutant genes through splicing and overlap extension PCR (SOE-PCR) (Horton et al. 1990) using  
312 primers listed in **Table S2** containing the corresponding mutations. After digested with the enzymes  
313 indicated in each PCR primer, the DNA fragments were individually cloned to pET28a at compatible  
314 sites, giving pET-Cas3, pET-Cas5, pET-Cas6, pET-Cas7, pET-Cas8, pET-K458A, pET-D608A, and  
315 pET-R887A.



316 For overexpression of the Cas3 variants in *Z. mobilis*, each gene was amplified from the pET-  
317 K458A, pET-D608A, and pET-R887A, respectively, using specific primers listed in **Table S2**, and  
318 clone to the pEZ15Asp vector or the genome editing plasmid pKO-ZMO0038n at EcoRI and XbaI  
319 sites, yielding pEZ-K458A, pEZ-D608A, and pEZ-R887A, or pKO-ZMO0038-K458A, pKO-ZMO0038-  
320 D608A, and pKO-ZMO0038-R887A, respectively.

321 All plasmids were listed in **Table S1**. All oligonucleotides were synthesized from GenScript (Nanjing,  
322 China) and listed in **Table S2**. Restriction enzymes and T5 exonuclease were purchased from New  
323 England Biolabs (Beijing) Ltd (Beijing, China).

324

### 325 **Expression and purification of Cas proteins**

326 The Cas expression plasmids were individually transformed into *E. coli* BL21 (DE3) and expression of  
327 the His-tagged Cas proteins was performed following the instruction of the protein purification kit  
328 (Qiagen, Valencia, CA, USA). Single colonies of transformed cells were cultivated overnight, followed  
329 by 1/100 dilution into 100 mL of LB media containing 100 µg/mL ampicillin. The cells were firstly  
330 incubated at 37°C to an OD<sub>600</sub> of 0.6-0.8, then transferred to a shaker and induced with isopropyl β-D-  
331 1-thiogalactopyranoside (IPTG) in a final concentration of 0.5 mM at 16°C. After continuously shaking  
332 for 22 hours, cells were harvested, lysed, and purified using Ni-NTA resin (Qiagen, Valencia, CA,  
333 USA). The purified proteins were desalted with desalting column (GE Healthcare, Chicago, IL, USA)  
334 using AKTA system (GE Healthcare, Chicago, IL, USA), and finally confirmed by SDS-PAGE  
335 electrophoresis.

336

### 337 **Plasmid DNA cleavage assay**

338 One hundred and fifty ng of the pL2R plasmid DNA was incubated at 30°C with 250 nM of Cas3 or  
339 one of the nCas3 variants, a crRNA carrying a spacer targeting a 5'-CCC-3' PAM-preceded 32-nt  
340 sequence of pL2R, and the Cascade proteins in a reaction buffer containing 2 mM MgCl<sub>2</sub> and 0.5 mM  
341 ATP. The reaction products were checked by agarose gel electrophoresis. The crRNA was  
342 synthesized from GenScript (Nanjing, China) and listed in **Table S2**.

### 343 **Construction and screening of mutants, and curing of genome editing plasmids**

344 The genome editing plasmids were individually introduced into *Z. mobilis* cells through electroporation.  
345 Electroporated cells were spread on RMG agar plates containing spectinomycin at a final  
346 concentration of 200 µg/mL (RMGSp) and incubated at 30°C until colonies were observed. Mutant  
347 candidates were screened by colony PCR using primers listed in **Table S2**. The resulting PCR  
348 products were analysed by agarose gel electrophoresis and confirmed by Sanger sequencing  
349 (GenScript, Nanjing, China). The genome editing plasmids were cured following the method we  
350 previously developed (Zheng et al. 2019).

351

### 352 **Availability of data and materials**

353 The authors declare that the main data supporting the findings of this work are available within the  
354 article and its supplementary information files or from the **corresponding** authors upon reasonable  
355 request.

### 356 **Competing interests**

357 The authors declare that they have no **competing** interests.

### 358 **Authors' contributions**

359 WP, YZ, SY, and LM designed the research; YH, QW, and JL performed the experiments; WP, YH,  
360 and YZ wrote the manuscript. All authors contributed to data analyses, read, revised and approved  
361 the final manuscript.

### 362 **Acknowledgements**

363 This work was supported by the Scientific Research Program of Hubei Provincial Department of  
364 Education (Q20161007), the National Key Technology Research, the Development Program of China  
365 (2018YFA0900300), the National natural Science Foundation of China (U1932141), the Hubei  
366 Technical Innovation Special Fund (2019AHB055 and 2018ACA149), and the Innovation Base for  
367 Introducing Talents of Discipline of Hubei Province (2019BJH021). WP acknowledges the support  
368 from the State Key Laboratory of Biocatalysis and Enzyme Engineering.

369

### 370 **References**

- 371 Anzalone AV, Koblan LW, Liu DR. 2020. Genome editing with CRISPR-Cas nucleases, base editors,  
372 transposases and prime editors. *Nat Biotechnol* **38**: 824-844.
- 373 Barrangou R, Doudna JA. 2016. Applications of CRISPR technologies in research and beyond. *Nat*  
374 *Biotechnol* **34**: 933-941.
- 375 Barrangou R, Fremaux C, Deveau H, Richards M, Boyaval P, Moineau S, Romero DA, Horvath P. 2007.  
376 CRISPR provides acquired resistance against viruses in prokaryotes. *Science* **315**: 1709-1712.
- 377 Bernheim A, Bikard D, Touchon M, Rocha EPC. 2019. A matter of background: DNA repair pathways  
378 as a possible cause for the sparse distribution of CRISPR-Cas systems in bacteria. *Philos Trans*  
379 *R Soc Lond B Biol Sci* **374**: 20180088.
- 380 Brouns SJ, Jore MM, Lundgren M, Westra ER, Slijkhuis RJ, Snijders AP, Dickman MJ, Makarova KS,  
381 Koonin EV, van der Oost J. 2008. Small CRISPR RNAs guide antiviral defense in prokaryotes.  
382 *Science* **321**: 960-964.
- 383 Cameron P, Coons MM, Klompe SE, Lied AM, Smith SC, Vidal B, Donohoue PD, Rotstein T, Kohrs BW,  
384 Nyer DB et al. 2019. Harnessing type I CRISPR-Cas systems for genome engineering in human  
385 cells. *Nat Biotechnol* **37**: 1471-1477.
- 386 Canez C, Selle K, Goh YJ, Barrangou R. 2019. Outcomes and characterization of chromosomal self-  
387 targeting by native CRISPR-Cas systems in *Streptococcus thermophilus*. *FEMS Microbiol Lett*  
388 **366**.
- 389 Chen Y, Liu J, Zhi S, Zheng Q, Ma W, Huang J, Liu Y, Liu D, Liang P, Songyang Z. 2020. Repurposing type  
390 I-F CRISPR-Cas system as a transcriptional activation tool in human cells. *Nat Commun* **11**:  
391 3136.
- 392 Cheng F, Gong L, Zhao D, Yang H, Zhou J, Li M, Xiang H. 2017. Harnessing the native type I-B CRISPR-  
393 Cas for genome editing in a polyploid archaeon. *J Genet Genomics* **44**: 541-548.
- 394 Cong L, Ran FA, Cox D, Lin SL, Barretto R, Habib N, Hsu PD, Wu XB, Jiang WY, Marraffini LA et al. 2013.

- 395 Multiplex genome engineering using CRISPR/Cas systems. *Science* **339**: 819-823.
- 396 Csorgo B, Leon LM, Chau-Ly IJ, Vasquez-Rifo A, Berry JD, Mahendra C, Crawford ED, Lewis JD, Bondy-  
397 Denomy J. 2020. A compact Cascade-Cas3 system for targeted genome engineering. *Nat*  
398 *Methods* **17**: 1183-1190.
- 399 Dolan AE, Hou Z, Xiao Y, Gramelspacher MJ, Heo J, Howden SE, Freddolino PL, Ke A, Zhang Y. 2019.  
400 Introducing a spectrum of long-range genomic deletions in human embryonic stem cells  
401 using Type I CRISPR-Cas. *Mol Cell* **74**: 936-950 e935.
- 402 Gong B, Shin M, Sun J, Jung CH, Bolt EL, van der Oost J, Kim JS. 2014. Molecular insights into DNA  
403 interference by CRISPR-associated nuclease-helicase Cas3. *Proc Natl Acad Sci U S A* **111**:  
404 16359-16364.
- 405 Graham DB, Root DE. 2015. Resources for the design of CRISPR gene editing experiments. *Genome*  
406 *Biol* **16**: 260.
- 407 He L, St John James M, Radovcic M, Ivancic-Bace I, Bolt EL. 2020. Cas3 Protein-A Review of a Multi-  
408 Tasking Machine. *Genes (Basel)* **11**.
- 409 Hidalgo-Cantabrana C, Barrangou R. 2020. Characterization and applications of Type I CRISPR-Cas  
410 systems. *Biochem Soc Trans* **48**: 15-23.
- 411 Hidalgo-Cantabrana C, Goh YJ, Pan M, Sanozky-Dawes R, Barrangou R. 2019. Genome editing using  
412 the endogenous type I CRISPR-Cas system in *Lactobacillus crispatus*. *Proc Natl Acad Sci U S A*  
413 **116**: 15774-15783.
- 414 Horton RM, Cai ZL, Ho SN, Pease LR. 1990. Gene splicing by overlap extension: tailor-made genes  
415 using the polymerase chain reaction. *BioTechniques* **8**: 528-535.
- 416 Leon LM, Mendoza SD, Bondy-Denomy J. 2018. How bacteria control the CRISPR-Cas arsenal. *Curr*  
417 *Opin Microbiol* **42**: 87-95.
- 418 Li Y, Pan S, Zhang Y, Ren M, Feng M, Peng N, Chen L, Liang YX, She Q. 2016. Harnessing Type I and  
419 Type III CRISPR-Cas systems for genome editing. *Nucleic Acids Res* **44**: e34.
- 420 Makarova KS, Wolf YI, Iranzo J, Shmakov SA, Alkhnbashi OS, Brouns SJJ, Charpentier E, Cheng D, Haft  
421 DH, Horvath P et al. 2020. Evolutionary classification of CRISPR-Cas systems: a burst of class 2  
422 and derived variants. *Nat Rev Microbiol* **18**: 67-83.
- 423 Morisaka H, Yoshimi K, Okuzaki Y, Gee P, Kunihiro Y, Sonpho E, Xu H, Sasakawa N, Naito Y, Nakada S et  
424 al. 2019. CRISPR-Cas3 induces broad and unidirectional genome editing in human cells. *Nat*  
425 *Commun* **10**: 5302.
- 426 Nishida K, Arazoe T, Yachie N, Banno S, Kakimoto M, Tabata M, Mochizuki M, Miyabe A, Araki M, Hara  
427 KY et al. 2016. Targeted nucleotide editing using hybrid prokaryotic and vertebrate adaptive  
428 immune systems. *Science* **353**.
- 429 Okamoto T, Nakamura K. 1992. Simple and highly efficient transformation method for *Zymomonas*  
430 *mobilis* - electroporation. *Biosci Biotechnol Biochem* **56**: 833-833.
- 431 Osakabe K, Wada N, Miyaji T, Murakami E, Marui K, Ueta R, Hashimoto R, Abe-Hara C, Kong BH, Yano  
432 K et al. 2020. Genome editing in plants using CRISPR type I-D nuclease. *Commun Biol* **3**.
- 433 Pickar-Oliver A, Black JB, Lewis MM, Mutchnick KJ, Klann TS, Gilcrest KA, Sitton MJ, Nelson CE,  
434 Barrera A, Bartelt LC et al. 2019. Targeted transcriptional modulation with type I CRISPR-Cas  
435 systems in human cells. *Nat Biotechnol* **37**: 1493-1501.
- 436 Przybilski R, Richter C, Gristwood T, Clulow JS, Vercoe RB, Fineran PC. 2011. Csy4 is responsible for  
437 CRISPR RNA processing in *Pectobacterium atrosepticum*. *RNA Biol* **8**: 517-528.
- 438 Pyne ME, Bruder MR, Moo-Young M, Chung DA, Chou CP. 2016. Harnessing heterologous and  
439 endogenous CRISPR-Cas machineries for efficient markerless genome editing in *Clostridium*.  
440 *Sci Rep* **6**: 25666.
- 441 Ran FA, Hsu PD, Lin CY, Gootenberg JS, Konermann S, Trevino AE, Scott DA, Inoue A, Matoba S, Zhang  
442 Y et al. 2013. Double nicking by RNA-guided CRISPR Cas9 for enhanced genome editing  
443 specificity. *Cell* **154**: 1380-1389.
- 444 Rollins MF, Chowdhury S, Carter J, Golden SM, Wilkinson RA, Bondy-Denomy J, Lander GC,  
445 Wiedenheft B. 2017. Cas1 and the Csy complex are opposing regulators of Cas2/3 nuclease

446 activity. *Proc Natl Acad Sci U S A* **114**: E5113-E5121.

447 Sinkunas T, Gasiunas G, Fremaux C, Barrangou R, Horvath P, Siksnys V. 2011. Cas3 is a single-stranded  
448 DNA nuclease and ATP-dependent helicase in the CRISPR/Cas immune system. *EMBO J* **30**:  
449 1335-1342.

450 Vento JM, Crook N, Beisel CL. 2019. Barriers to genome editing with CRISPR in bacteria. *J Ind*  
451 *Microbiol Biotechnol* **46**: 1327-1341.

452 Vercoe RB, Chang JT, Dy RL, Taylor C, Gristwood T, Clulow JS, Richter C, Przybilski R, Pitman AR,  
453 Fineran PC. 2013. Cytotoxic chromosomal targeting by CRISPR/Cas systems can reshape  
454 bacterial genomes and expel or remodel pathogenicity islands. *Plos Genet* **9**: e1003454.

455 Wigley DB. 2013. Bacterial DNA repair: recent insights into the mechanism of RecBCD, AddAB and  
456 AdnAB. *Nat Rev Microbiol* **11**: 9-13.

457 Xia Y, Li K, Li J, Wang T, Gu L, Xun L. 2019. T5 exonuclease-dependent assembly offers a low-cost  
458 method for efficient cloning and site-directed mutagenesis. *Nucleic acids research* **47**: e15.

459 Xu Z, Li M, Li Y, Cao H, Miao L, Xu Z, Higuchi Y, Yamasaki S, Nishino K, Woo PCY et al. 2019. Native  
460 CRISPR-Cas-mediated genome editing enables dissecting and sensitizing clinical multidrug-  
461 resistant *P. aeruginosa*. *Cell Rep* **29**: 1707-1717 e1703.

462 Xu Z, Li Y, Li M, Xiang H, Yan A. 2021. Harnessing the type I CRISPR-Cas systems for genome editing in  
463 prokaryotes. *Environ Microbiol* **23**: 542-558.

464 Yang S, Mohagheghi A, Franden MA, Chou YC, Chen X, Dowe N, Himmel ME, Zhang M. 2016.  
465 Metabolic engineering of *Zymomonas mobilis* for 2,3-butanediol production from  
466 lignocellulosic biomass sugars. *Biotechnol Biofuels* **9**: 189.

467 Yang S, Vera JM, Grass J, Savvakis G, Moskvina OV, Yang Y, McIlwain SJ, Lyu Y, Zinonos I, Hebert AS et al.  
468 2018. Complete genome sequence and the expression pattern of plasmids of the model  
469 ethanologen *Zymomonas mobilis* ZM4 and its xylose-utilizing derivatives 8b and 2032.  
470 *Biotechnol Biofuels* **11**: 125.

471 Zhang J, Zong W, Hong W, Zhang ZT, Wang Y. 2018. Exploiting endogenous CRISPR-Cas system for  
472 multiplex genome editing in *Clostridium tyrobutyricum* and engineer the strain for high-level  
473 butanol production. *Metab Eng* **47**: 49-59.

474 Zhang YP, Vera JM, Xie D, Serate J, Pohlmann E, Russell JD, Hebert AS, Coon JJ, Sato TK, Landick R.  
475 2019. Multiomic fermentation using chemically defined synthetic hydrolyzates revealed  
476 multiple effects of lignocellulose-derived inhibitors on cell physiology and xylose utilization in  
477 *Zymomonas mobilis*. *Front Microbiol* **10**.

478 Zheng Y, Han J, Wang B, Hu X, Li R, Shen W, Ma X, Ma L, Yi L, Yang S et al. 2019. Characterization and  
479 repurposing of the endogenous Type I-F CRISPR-Cas system of *Zymomonas mobilis* for  
480 genome engineering. *Nucleic Acids Res* **47**: 11461-11475.

481 Zheng Y, Li J, Wang B, Han J, Hao Y, Wang S, Ma X, Yang S, Ma L, Yi L et al. 2020. Endogenous Type I  
482 CRISPR-Cas: from foreign DNA defense to prokaryotic engineering. *Front Bioeng Biotechnol* **8**:  
483 62.  
484  
485

486 **Figures, tables, and figure legends**

487

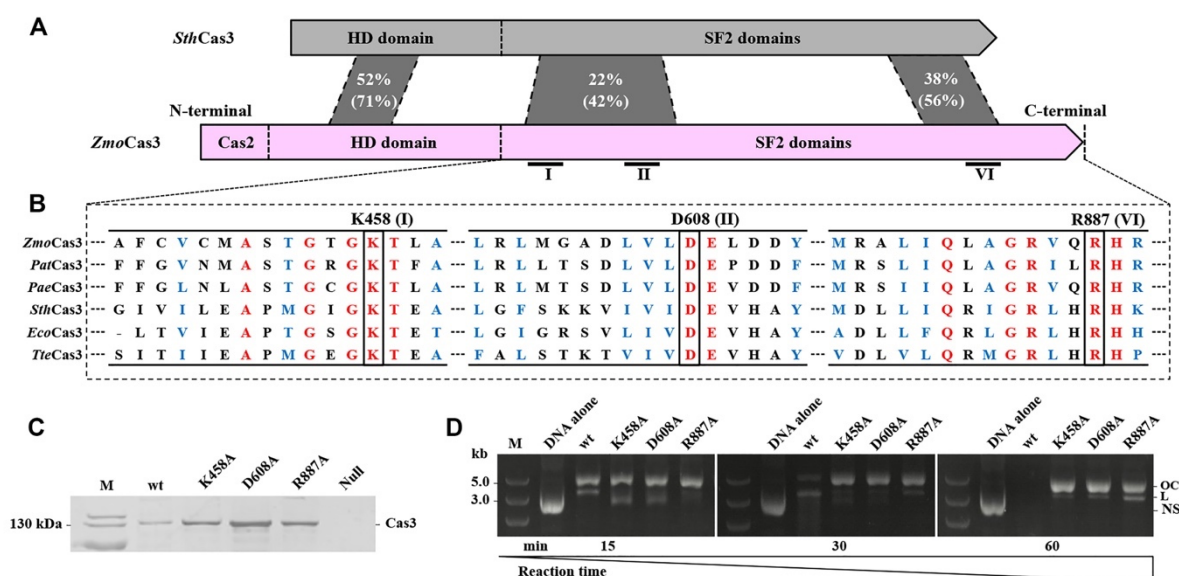

488

489 **Fig. 1 Construction of Cas3 nickase mutants.** (A) Schematic organization of Cas3 proteins from  
 490 *Zymomonas mobilis* ZM4 (*ZmoCas3*) and *Streptococcus thermophilus* DGCC7710 (*SthCas3*).  
 491 Domain architecture of the Cas3 proteins identified by *in silico* analysis is shown as pink (*ZmoCas3*)  
 492 and grey (*SthCas3*) boxes, respectively. Percentage of identical and similar (in parenthesis) residues  
 493 between conserved sequence blocks is shown. For *ZmoCas3*, Cas2 denotes the N-terminally fused  
 494 Cas2 domain; HD domain denotes HD-type phosphohydrolase/nuclease domain; SF2 domains  
 495 denote helicase domains. (B) Locations of the conserved helicase motifs (I, II, and VI)  
 496 which were identified by alignment of Cas3 proteins from different CRISPR-Cas systems of Type I-E  
 497 and I-F. Conserved residues characteristic of each motif (K458 of motif I, D608 of motif II, and R887  
 498 of motif VI, respectively) being subjected to alanine mutagenesis are indicated above the  
 499 corresponding positions. *Pat*, *Pectobacterium atrosepticum*; *Pae*, *Pseudomonas aeruginosa*; *Eco*,  
 500 *Escherichia coli* K-12; *Tte*, *Thermobaculum terrenum*. (C) Coomassie blue-stained SDS-PAGE of  
 501 purified Cas3 proteins expressed in *E. coli*, including the wild-type *ZmoCas3* (wt) and three Cas3  
 502 nickase candidates. Null, *E. coli* BL21 (DE3) cells carrying the cloning vector pET28a; M, protein size  
 503 marker. (D) Analyses of plasmid DNA cleavage by the purified Cas3 proteins as indicated in (C) via  
 504 electrophoreses using agarose gels. OC, open circle; L, linear; NS, negatively supercoiled; M, DNA  
 505 size marker.

506



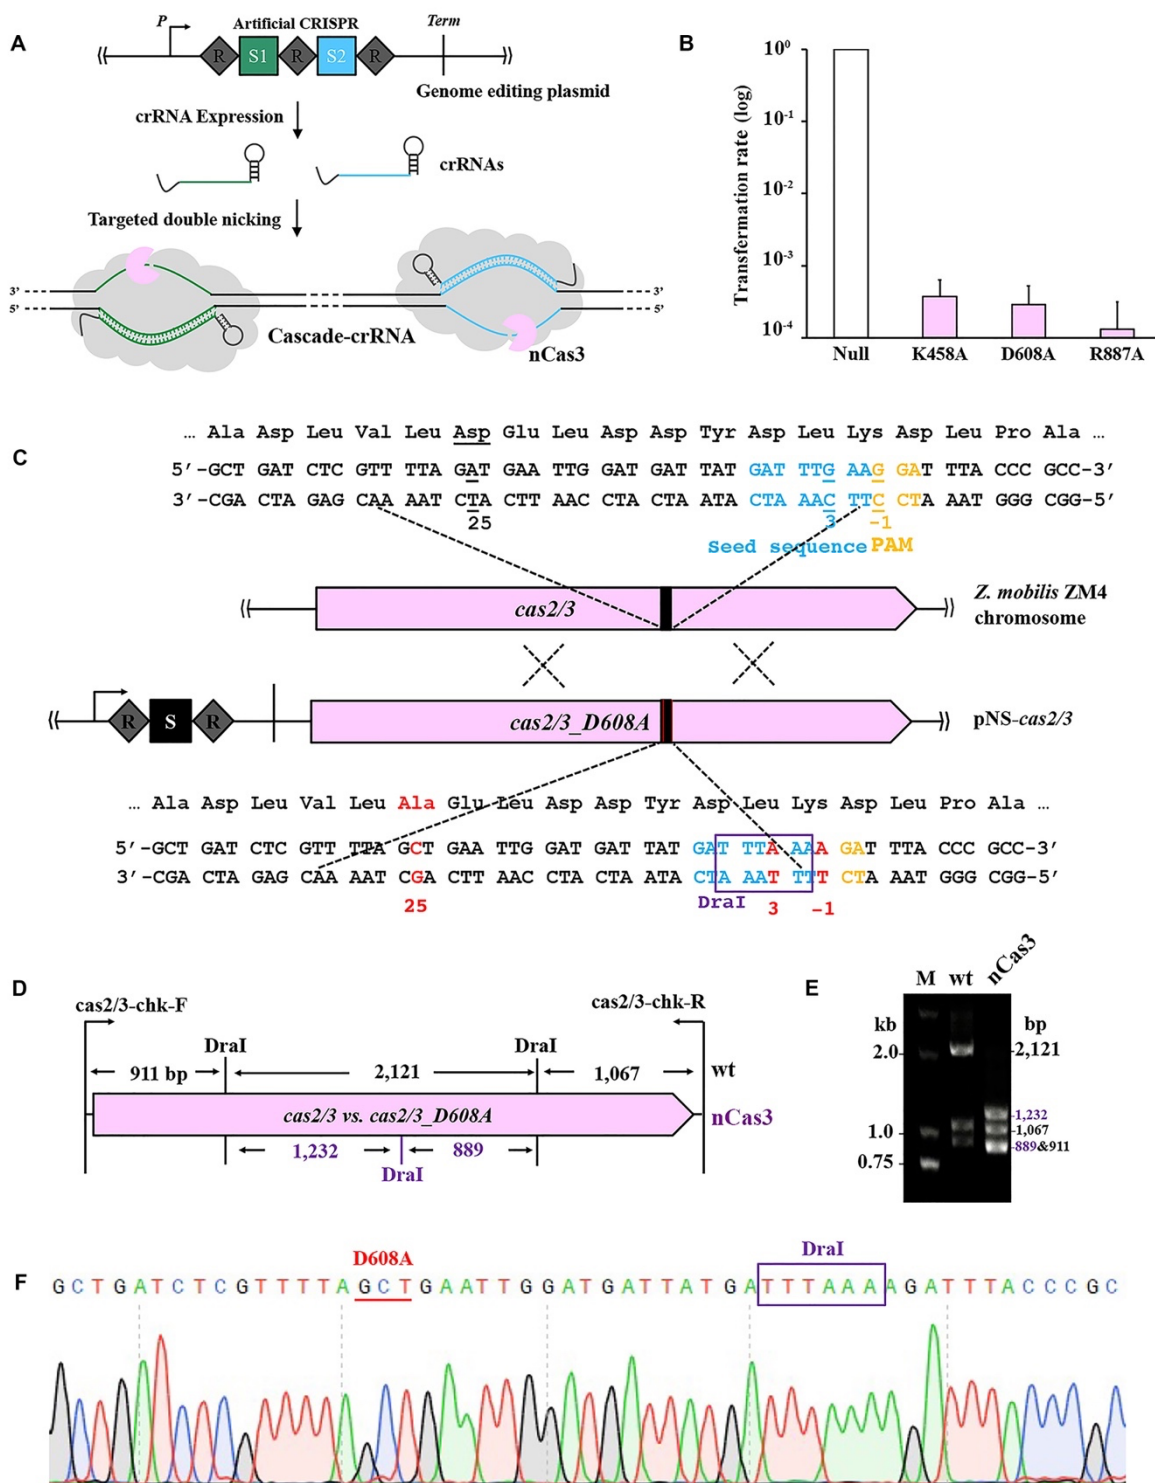

507

508 **Fig. 2 Establishment of a Cascade-nCas3-mediated genome editing tool.** (A) A genome  
 509 editing plasmid contained an artificial CRISPR locus consisting of two spacers (S1 and S2) and  
 510 three insulating direct repeats (R). Paired self-targeting crRNAs were to be produced from the  
 511 artificial CRISPR and simultaneously guide Cascade complexes to bind to two target sequences  
 512 matching S1 and S2, respectively, located on opposing strands. The nCas3s were then recruited  
 513 to nick the dsDNA within the target sequences. (B) Transforming competent cells of the  $\Delta cas2/3$

514 strain with *ZMO0038* knockout plasmids each expressing a Cas3 nickase mutant (K458A, D608A,  
515 or R887A). Transformation rates are present as relative values to that with a reference plasmid  
516 with no Cas3-encoding gene (Null), the latter of which was set to be 1.0. Experiments were  
517 performed in triplicate. Error bars represent the standard deviation of the mean. **(C)** Schematic  
518 showing nucleotide substitution of *cas2/3*. The spacer in the genome editing plasmid (pNS-  
519 *cas2/3*) for nucleotide substitution of *cas2/3* and the corresponding protospacer in *cas2/3* are  
520 indicated as a black box. The PAM motifs are shown in orange while the seed sequence in crane.  
521 The designed mutations are indicated as red fonts in *cas2/3\_D608A*, whereas the corresponding  
522 original nucleotides are underlined in *cas2/3*. The restriction site for Dral (TTTAAA) that is to be  
523 introduced is framed in a purple box. **(D)** Schematic showing the digestion sites by Dra, among  
524 which the newly introduced one is in purple, in the PCR fragments amplified by a primer set of  
525 *cas2/3-chk-F* and *cas2/3-chk-R*. the predicted sizes of digestion products are indicated. **(E)**  
526 Electrophoretic analysis of Dral-treated colony PCR products amplified from the wild-type strain  
527 (wt) and the mutant candidate (nCas3) using primers shown in **(D)**. M, DNA size marker. **(F)**  
528 Representative chromatographs of Sanger sequencing confirming the designed nucleotide  
529 substitutions in *cas2/3*.

530

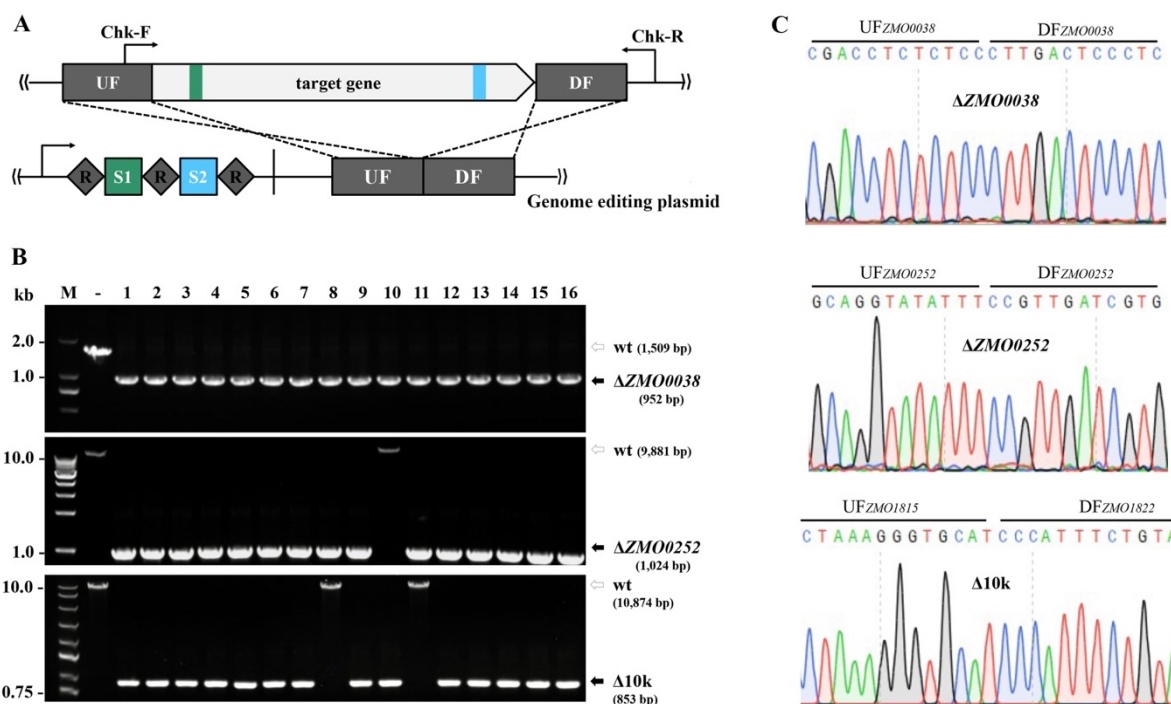

531

532 **Fig. 3 Efficient genome editing using CRISPR-nCas3.** (A) Schematic showing design of the  
 533 genome editing plasmid. An artificial CRISPR expressing two targeting crRNAs and a donor DNA  
 534 consisting of an up-flanking (UF) and a down-flanking (DF) DNA stretches of the target gene are  
 535 contained in the all-in-one editing plasmid. (B) Colony PCR screening of deletion mutants of  
 536 *ZMO0038* (upper panel), *ZMO0252* (middle), a ~10-kb genomic fragment (lower panel), respectively,  
 537 using a gene-specific primer set, Chk-F/ChkR, as indicated in (A). Predicted sizes of PCR products in  
 538 wild-type (wt) and the expected deletion mutants ( $\Delta ZMO0038$ ,  $\Delta ZMO0252$  or  $\Delta 10k$ ) are indicated with  
 539 unfilled and filled black arrows, respectively. -, PCR amplification using genomic DNA of *Z. mobilis*  
 540 ZM4 as a DNA template; M, DNA size marker. (C) Representative chromatographs of Sanger  
 541 sequencing results.

542

543

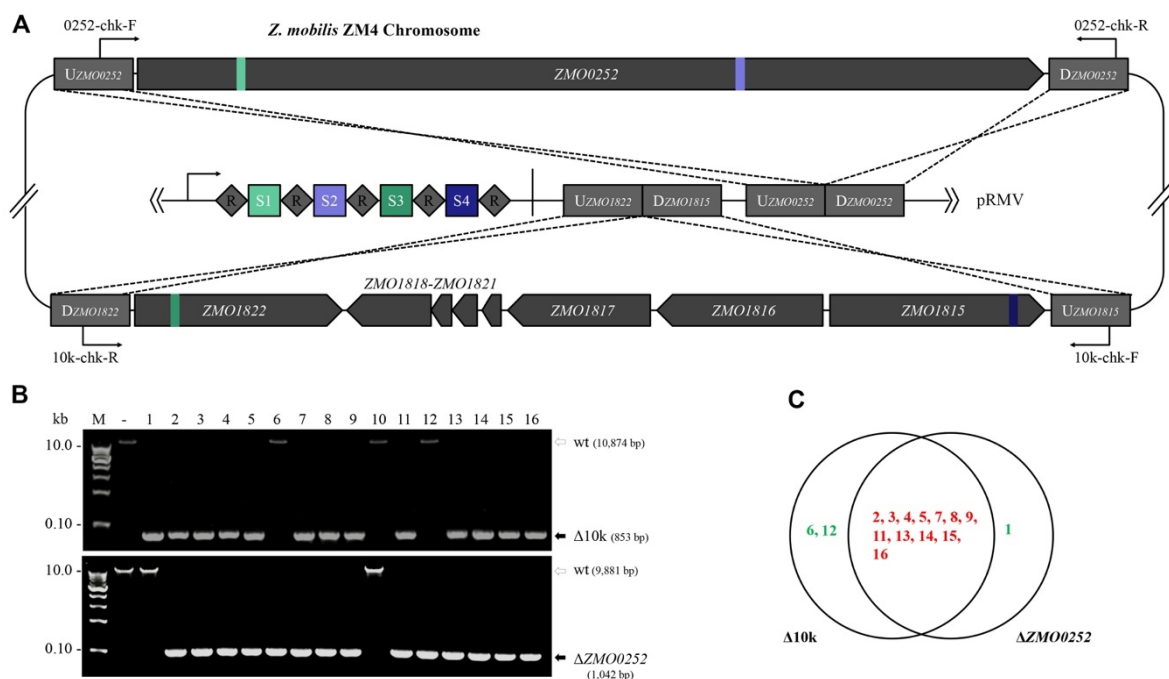

544

545 **Fig. 4 Simultaneous removal of two large genomic fragments using CRISPR-nCas3. (A)**

546 Schematic showing design of an 8,995-bp ZMO0052 gene and a ~10-kb genomic fragment (spanning  
 547 genes of *ZMO1815-ZMO1822*) deletion. The pRMV encodes four spacers with S1 and S2 matching  
 548 sequences within the *ZMO0052* gen while S3 and S4 within the 10-kb region, respectively. DNAs up-  
 549 flanking (UF) and down-flanking (DF) of the targets were concatenated on the same plasmid as  
 550 recombination donors. **(B)** Colony PCR screening of deletion mutants of the 10k genomic fragment  
 551 (upper panel) and *ZMO0052* (lower panel), respectively, using specific primer sets as indicated in **(A)**.  
 552 Predicted sizes of PCR products in wild-type (wt) and the expected deletion mutants ( $\Delta$ 10k or  
 553  $\Delta$ ZMO0052) are indicated with unfilled and filled black arrows, respectively. -, PCR amplification using  
 554 genomic DNA of *Z. mobilis* ZM4 as a DNA template; M, DNA size marker. **(C)** Distribution of genomic  
 555 deletions in the tested transformants. Transformants with both deletions or single deletion are shown  
 556 in red and green fonts, respectively.

557

558 **Tables**

559

560 **Table 1.** Transformation rates (TR) and editing efficiencies (EE) of various genome-editing plasmids  
561 in *Z. mobilis* DRM1 and DRM2, respectively.

| Plasmid      | TR (cfu/μg DNA)               |                               | EE [% (editing/tested)] |               |
|--------------|-------------------------------|-------------------------------|-------------------------|---------------|
|              | DRM1                          | DRM2                          | DRM1                    | DRM2          |
| pEZ15Asp     | $(3.21 \pm 1.53) \times 10^6$ | $(2.33 \pm 1.23) \times 10^6$ | -                       | -             |
| pKO-ZMO0038n | -                             | $(4.09 \pm 1.14) \times 10^5$ | -                       | 100 (16/16)   |
| pKO-ZMO0252  | $(9.49 \pm 0.51) \times 10^2$ | $(2.47 \pm 0.65) \times 10^5$ | 37.5 (6/16)             | 93.75 (15/16) |
| pDel-10k     | $(1.51 \pm 0.51) \times 10^3$ | $(3.02 \pm 0.83) \times 10^4$ | 31.25 (5/16)            | 87.5 (14/16)  |
| pRMV         | -                             | $(7.26 \pm 0.25) \times 10^4$ | -                       | 93.75 (15/16) |

- : Not determined

562
